# Supplementary material
Source: Springer Nature journal article supplement (https://www.springermedizin.de/resource/supplementary/13037_2014_195_MOESM4_ESM.pdf/9659530)

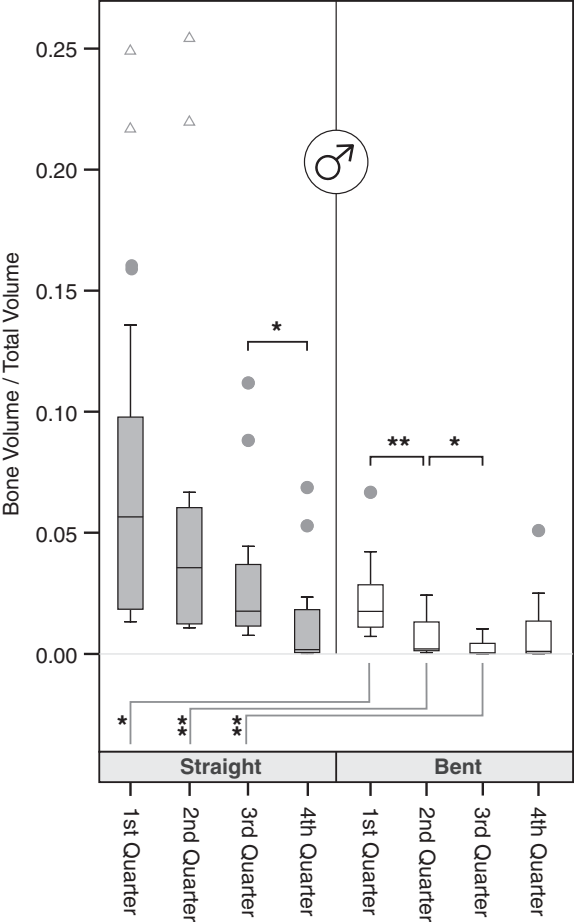

Supplement: MOESM4 [file 9659530]
